# Supplementary material for: A Transcriptionally Distinct Subpopulation of Healthy Acinar Cells Exhibit Features of Pancreatic Progenitors and PDAC
Source: Oxford University Press journal article supplement (doi:10.1158/0008-5472.can-21-0427), 2021-05-28
Supplement: 00085472can210427-sup-260380_2_supp_7097406_qslns8.xlsx [file 00085472can210427-sup-260380_2_supp_7097406_qslns8.xlsx]

## Sheet: Sheet1
gene_name	Bin 1	Bin 2	Bin 3
RUNX1	0.205212	0.208809	0.350734
TFAP2A	0.216612	0.19739	0.316476
TFAP2A(var.2)	0.154723	0.215334	0.376835
TFAP2A(var.3)	0.166124	0.22186	0.376835
ARNT::HIF1A	0.214984	0.216966	0.318108
ARNT2	0.239414	0.254486	0.251223
PPARG	0.224756	0.208809	0.290375
RARA::RXRA	0.200326	0.241436	0.2969
BARHL2	0.151466	0.127243	0.0978793
RARA	0.128664	0.195759	0.435563
RARA(var.2)	0.254072	0.243067	0.215334
BARHL1	0.131922	0.115824	0.181077
PPARA::RXRA	0.21987	0.243067	0.290375
RARA::RXRG	0.260586	0.239804	0.216966
BARX2	0.0130293	0.0130506	0.00652529
PPARD	0.218241	0.261011	0.22186
RARB(var.3)	0.237785	0.230016	0.228385
RARG(var.3)	0.247557	0.233279	0.239804
PAX5	0.270358	0.202284	0.257749
NR2F1	0.20684	0.207178	0.311582
NR2F1(var.2)	0.203583	0.247961	0.305057
NR2F1(var.3)	0.271987	0.236542	0.195759
CREB1	0.203583	0.21044	0.313214
CEBPA	0.148208	0.207178	0.30832
E2F1	0.179153	0.220228	0.357259
NFIL3	0.185668	0.185971	0.190865
ELK1	0.169381	0.239804	0.314845
FOXF2	0.229642	0.251223	0.272431
FOXC1	0.236156	0.195759	0.106036
GATA1	0.0407166	0.0244698	0.0277325
GATA1::TAL1	0.245928	0.233279	0.159869
GATA2	0.31759	0.241436	0.0848287
GFI1	0.355049	0.265905	0.106036
KLF4	0.120521	0.195759	0.411093
HLF	0.245928	0.228385	0.203915
HNF1A	0.30456	0.280587	0.132137
FOXA2	0.28013	0.233279	0.212072
NHLH1	0.237785	0.233279	0.254486
IRF1	0.162866	0.233279	0.306688
IRF2	0.184039	0.199021	0.301794
MEF2A	0.309446	0.252855	0.200653
MZF1	0.149837	0.184339	0.402936
MZF1(var.2)	0.167752	0.230016	0.37031
MAX	0.281759	0.23491	0.181077
MAX::MYC	0.322476	0.277325	0.120718
MYCN	0.2443	0.233279	0.244698
MYC	0.2557	0.215334	0.249592
NFYA	0.298046	0.226754	0.176183
GABPA	0.188925	0.244698	0.300163
NKX2-5	0.214984	0.257749	0.251223
RXRA::VDR	0.262215	0.216966	0.185971
NR1H2::RXRA	0.200326	0.261011	0.236542
NR1H4::RXRA	0.258958	0.236542	0.205546
NR4A2::RXRA	0.242671	0.228385	0.218597
PAX6	0.20684	0.203915	0.262643
PBX1	0.239414	0.164763	0.106036
RORA	0.20684	0.218597	0.262643
RORA(var.2)	0.198697	0.158238	0.205546
RREB1	0.172638	0.212072	0.363785
VDR	0.249186	0.228385	0.159869
ELK4	0.169381	0.236542	0.349103
SOX9	0.299674	0.262643	0.207178
SP1	0.169381	0.17292	0.355628
SPI1	0.20684	0.269168	0.272431
SPIB	0.143322	0.23491	0.375204
SRF	0.301303	0.239804	0.177814
ZNF143	0.258958	0.244698	0.216966
NFE2L1	0.135179	0.181077	0.461664
TEAD1	0.216612	0.249592	0.226754
TAL1::TCF3	0.288274	0.22186	0.184339
TCF3	0.271987	0.228385	0.226754
USF1	0.197068	0.23491	0.30832
YY1	0.141694	0.194127	0.425775
ETS1	0.184039	0.226754	0.339315
FOS::JUN	0.102606	0.185971	0.476346
FOS	0.0570033	0.138662	0.50571
FOSL1	0.0830619	0.158238	0.49429
FOSL2	0.0635179	0.163132	0.528548
FOS::JUN(var.2)	0.20684	0.215334	0.318108
FOSB::JUN	0.17101	0.220228	0.334421
FOSL1::JUN	0.0960912	0.177814	0.451876
FOSL1::JUN(var.2)	0.242671	0.243067	0.252855
FOSL2::JUN	0.0798046	0.164763	0.473083
FOSL2::JUN(var.2)	0.187296	0.226754	0.33279
FOS::JUNB	0.161238	0.207178	0.384992
FOSB::JUNB	0.105863	0.168026	0.453507
FOSB::JUNB(var.2)	0.242671	0.243067	0.252855
FOSL1::JUNB	0.0798046	0.159869	0.49429
FOSL2::JUNB	0.123779	0.184339	0.443719
FOSL2::JUNB(var.2)	0.175896	0.239804	0.324633
FOS::JUND	0.136808	0.19739	0.396411
FOSL1::JUND	0.0814332	0.154976	0.495922
FOSL1::JUND(var.2)	0.208469	0.216966	0.314845
FOSL2::JUND	0.125407	0.179445	0.451876
FOSL2::JUND(var.2)	0.210098	0.22186	0.316476
BATF::JUN	0.0765472	0.184339	0.500816
JUN	0.20684	0.199021	0.314845
JUN(var.2)	0.112378	0.189233	0.437194
JUNB	0.120521	0.17292	0.433931
JUND	0.112378	0.171289	0.446982
JUND(var.2)	0.21987	0.19739	0.331158
JUN::JUNB	0.125407	0.202284	0.430669
JUN::JUNB(var.2)	0.140065	0.226754	0.357259
JUNB(var.2)	0.187296	0.225122	0.327896
MYB	0.149837	0.208809	0.424144
MYBL1	0.117264	0.102773	0.0685155
MYBL2	0.285016	0.247961	0.182708
REL	0.180782	0.159869	0.404568
RELA	0.109121	0.14845	0.461664
RELB	0.224756	0.247961	0.282219
ZEB1	0.283388	0.244698	0.203915
NFKB1	0.174267	0.213703	0.28385
TP53	0.263844	0.261011	0.181077
TBP	0.245928	0.23491	0.236542
HLTF	0.28013	0.244698	0.112561
ESR1	0.247557	0.243067	0.19739
NR3C1	0.236156	0.24633	0.256117
HNF4A	0.21987	0.236542	0.256117
HNF4A(var.2)	0.154723	0.203915	0.375204
NFIC::TLX1	0.197068	0.231648	0.292007
NFIC	0.26873	0.269168	0.187602
NFIC(var.2)	0.200326	0.220228	0.318108
HINFP	0.224756	0.21044	0.282219
ELF5	0.175896	0.244698	0.303426
STAT1	0.193811	0.228385	0.2969
STAT1::STAT2	0.136808	0.192496	0.349103
REST	0.257329	0.239804	0.212072
CTCF	0.213355	0.243067	0.301794
CTCFL	0.153094	0.212072	0.347471
ESRRB	0.242671	0.287113	0.203915
POU5F1	0.319218	0.298532	0.0978793
SOX2	0.289902	0.243067	0.153344
SOX21	0.156352	0.104405	0.0766721
STAT3	0.197068	0.228385	0.340946
TFCP2	0.226384	0.190865	0.230016
FOXA1	0.276873	0.212072	0.168026
HNF1B	0.306189	0.272431	0.130506
EBF1	0.15798	0.220228	0.396411
SREBF1	0.159609	0.228385	0.363785
SREBF1(var.2)	0.161238	0.203915	0.391517
INSM1	0.21987	0.241436	0.257749
FEV	0.179153	0.239804	0.339315
NR4A2	0.205212	0.25938	0.254486
EGR1	0.167752	0.231648	0.336052
PLAG1	0.149837	0.22186	0.383361
ESR2	0.164495	0.216966	0.363785
HIF1A	0.263844	0.225122	0.25938
SOX10	0.252443	0.254486	0.220228
BATF3	0.114007	0.195759	0.445351
BATF	0.112378	0.185971	0.48124
BCL6	0.192182	0.19739	0.352365
BCL6B	0.271987	0.272431	0.192496
BHLHE40	0.241042	0.230016	0.2969
CDX2	0.0570033	0.050571	0.0212072
CEBPB	0.218241	0.200653	0.208809
E2F3	0.198697	0.225122	0.375204
E2F4	0.226384	0.24633	0.267537
E2F6	0.136808	0.185971	0.406199
EGR2	0.143322	0.190865	0.424144
ELF1	0.161238	0.241436	0.334421
ERG	0.172638	0.238173	0.340946
EWSR1-FLI1	0.184039	0.22186	0.337684
FLI1	0.161238	0.220228	0.396411
FOXH1	0.228013	0.226754	0.257749
FOXP1	0.254072	0.207178	0.190865
GATA4	0.26873	0.252855	0.184339
HNF4G	0.236156	0.23491	0.239804
HOXC9	0.263844	0.251223	0.161501
HSF1	0.151466	0.181077	0.381729
KLF13	0.2443	0.215334	0.280587
KLF14	0.18241	0.189233	0.318108
KLF16	0.151466	0.200653	0.391517
KLF10	0.166124	0.168026	0.388254
KLF11	0.172638	0.195759	0.357259
KLF15	0.14658	0.202284	0.365416
KLF17	0.159609	0.159869	0.451876
MAFF	0.198697	0.164763	0.309951
MAFK	0.151466	0.241436	0.339315
MEF2C	0.254072	0.239804	0.153344
MEIS1(var.2)	0.29316	0.231648	0.12398
MAF::NFE2	0.0977199	0.179445	0.504078
MAFG	0.174267	0.199021	0.337684
MAF	0.249186	0.230016	0.207178
MAFA	0.237785	0.233279	0.239804
NFE2	0.0960912	0.17292	0.477977
NFYB	0.20684	0.236542	0.295269
NR2C2	0.283388	0.199021	0.272431
NR2C2(var.2)	0.265472	0.200653	0.225122
NRF1	0.187296	0.223491	0.339315
POU2F2	0.302932	0.277325	0.156607
PRDM1	0.226384	0.244698	0.2969
RFX1	0.254072	0.208809	0.247961
RFX5	0.324104	0.261011	0.1354
RUNX2	0.271987	0.252855	0.213703
SMAD2::SMAD3::SMAD4	0.234528	0.230016	0.230016
SMAD3	0.21987	0.216966	0.241436
SP2	0.18241	0.199021	0.339315
TCF12(var.2)	0.288274	0.241436	0.215334
TCF7L2	0.299674	0.23491	0.168026
TFAP2C	0.15798	0.218597	0.378467
TFAP2C(var.2)	0.211726	0.223491	0.32137
TFAP2C(var.3)	0.156352	0.22186	0.388254
TP63	0.250814	0.233279	0.161501
USF2	0.20684	0.243067	0.301794
ZBTB33	0.184039	0.243067	0.319739
ZNF263	0.105863	0.189233	0.445351
BACH1	0.12215	0.205546	0.415987
ESRRA	0.241042	0.267537	0.218597
FOXP2	0.214984	0.19739	0.277325
HOXA9	0.258958	0.24633	0.19739
SREBF2	0.20684	0.231648	0.311582
SREBF2(var.2)	0.278502	0.216966	0.269168
THAP1	0.250814	0.230016	0.23491
THAP11	0.281759	0.264274	0.164763
EHF	0.184039	0.228385	0.306688
KLF5	0.159609	0.187602	0.399674
RFX2	0.320847	0.251223	0.151713
ATF3	0.20684	0.223491	0.285481
NFAT5	0.138436	0.19739	0.272431
CREM	0.224756	0.179445	0.347471
DMRT3	0.0130293	0.0146819	0
HES2	0.241042	0.216966	0.274062
MITF	0.254072	0.223491	0.228385
MLXIPL	0.294788	0.24633	0.187602
NFATC1	0.188925	0.226754	0.220228
NFATC3	0.188925	0.226754	0.220228
POU2F3	0.306189	0.298532	0.08646
POU6F1(var.2)	0.242671	0.243067	0.265905
TCFL5	0.2443	0.228385	0.278956
ALX3	0.252443	0.239804	0.244698
BHLHE41	0.252443	0.230016	0.241436
CENPB	0.156352	0.202284	0.40783
CREB3	0.306189	0.230016	0.182708
CREB3L1	0.296417	0.233279	0.199021
CREB3L4	0.257329	0.231648	0.243067
CREB3L4(var.2)	0.20684	0.208809	0.274062
DBP	0.263844	0.292007	0.208809
ELF3	0.175896	0.233279	0.337684
ELF4	0.188925	0.254486	0.293638
EN2	0.23127	0.24633	0.23491
ESX1	0.30456	0.22186	0.141925
HESX1	0.301303	0.226754	0.19739
ETV6	0.164495	0.239804	0.344209
GCM1	0.298046	0.285481	0.150082
GRHL1	0.192182	0.203915	0.257749
GSC	0.234528	0.195759	0.208809
GSC2	0.224756	0.205546	0.200653
HEY2	0.325733	0.231648	0.169657
HOXA13	0.13355	0.154976	0.12398
HOXC11	0.0309446	0.0228385	0.0130506
IRF8	0.161238	0.207178	0.342577
IRF9	0.138436	0.213703	0.34584
JDP2	0.140065	0.194127	0.391517
JDP2(var.2)	0.192182	0.264274	0.298532
MEF2B	0.288274	0.23491	0.171289
MEOX1	0.298046	0.24633	0.264274
MIXL1	0.250814	0.216966	0.274062
MLX	0.296417	0.239804	0.182708
MSC	0.28013	0.241436	0.158238
MYF6	0.221498	0.264274	0.207178
NEUROD2	0.0977199	0.0929853	0.0619902
NFIA	0.249186	0.239804	0.189233
NFIX	0.257329	0.254486	0.187602
NFIX(var.2)	0.130293	0.21044	0.381729
NKX2-3	0.257329	0.24633	0.151713
NKX2-8	0.271987	0.241436	0.141925
NR2F6(var.3)	0.239414	0.220228	0.244698
OLIG2	0.0553746	0.0554649	0.0212072
ONECUT1	0.177524	0.158238	0.153344
PITX1	0.23127	0.218597	0.21044
RUNX3	0.239414	0.228385	0.164763
SP4	0.138436	0.176183	0.411093
SPDEF	0.241042	0.25938	0.230016
TBX2	0.242671	0.22186	0.24633
TBX20	0.236156	0.231648	0.280587
TBX21	0.245928	0.236542	0.254486
TFAP4	0.278502	0.241436	0.185971
TFAP4(var.2)	0.0325733	0.0342577	0.0163132
TFEB	0.249186	0.257749	0.233279
ZBTB7B	0.221498	0.236542	0.285481
ZBTB7C	0.247557	0.225122	0.270799
ZIC1	0.166124	0.213703	0.378467
ZBTB18	0.2557	0.24633	0.239804
LBX2	0.283388	0.238173	0.141925
LHX2	0.330619	0.282219	0.220228
MEOX2	0.0114007	0.00815661	0
MNX1	0.0472313	0.0734095	0.045677
OTX1	0.175896	0.215334	0.316476
PITX3	0.229642	0.208809	0.185971
RAX	0.319218	0.23491	0.220228
RHOXF1	0.198697	0.239804	0.298532
VENTX	0.0928339	0.176183	0.208809
NR3C2	0.263844	0.24633	0.225122
EGR3	0.159609	0.19739	0.367047
EGR4	0.123779	0.166395	0.41925
GLI2	0.162866	0.187602	0.352365
GLIS1	0.175896	0.199021	0.381729
GLIS2	0.156352	0.194127	0.420881
GLIS3	0.161238	0.190865	0.40783
HIC2	0.296417	0.238173	0.194127
SCRT1	0.177524	0.182708	0.362153
SCRT2	0.260586	0.212072	0.264274
SNAI2	0.309446	0.239804	0.161501
SP3	0.130293	0.17292	0.427406
YY2	0.19544	0.205546	0.303426
ZBED1	0.197068	0.168026	0.146819
ZBTB7A	0.118893	0.213703	0.396411
ZNF410	0.289902	0.23491	0.125612
ZNF740	0.125407	0.187602	0.415987
ONECUT2	0.21987	0.200653	0.169657
ONECUT3	0.23127	0.218597	0.166395
E2F7	0.257329	0.249592	0.187602
ELK3	0.174267	0.239804	0.32137
ERF	0.177524	0.207178	0.384992
ETV1	0.201954	0.243067	0.293638
ETV2	0.23127	0.228385	0.293638
ETV3	0.213355	0.24633	0.287113
ETV4	0.257329	0.256117	0.243067
ETV5	0.174267	0.238173	0.336052
GATA5	0.140065	0.181077	0.399674
LEF1	0.229642	0.226754	0.24633
TCF7	0.249186	0.216966	0.158238
TCF7L1	0.20684	0.218597	0.306688
HSF2	0.169381	0.179445	0.33279
HSF4	0.18241	0.228385	0.318108
IRF7	0.138436	0.216966	0.28385
MEF2D	0.307818	0.249592	0.241436
MEIS2	0.263844	0.215334	0.225122
MEIS2(var.2)	0.249186	0.174551	0.0717781
MEIS3	0.245928	0.22186	0.292007
NFKB2	0.14658	0.200653	0.384992
PAX1	0.21987	0.203915	0.300163
PAX3(var.2)	0.208469	0.216966	0.305057
PAX9	0.223127	0.212072	0.257749
PKNOX1	0.276873	0.24633	0.195759
PKNOX2	0.239414	0.212072	0.285481
POU2F1	0.36645	0.339315	0.11093
POU3F1	0.348534	0.331158	0.109299
POU3F3	0.193811	0.19739	0.228385
POU4F1	0.0537459	0.0636215	0.0750408
POU6F2	0.26873	0.257749	0.249592
PROX1	0.361564	0.313214	0.130506
TGIF1	0.205212	0.208809	0.334421
TGIF2	0.252443	0.208809	0.261011
TGIF2LX	0.262215	0.200653	0.24633
TGIF2LY	0.257329	0.189233	0.23491
RFX3	0.294788	0.228385	0.190865
RFX4	0.301303	0.244698	0.168026
EOMES	0.249186	0.252855	0.230016
MGA	0.289902	0.254486	0.187602
TBX15	0.289902	0.254486	0.187602
TBX19	0.131922	0.192496	0.365416
TBX1	0.289902	0.254486	0.187602
TBX18	0.254072	0.254486	0.230016
TBX4	0.289902	0.254486	0.187602
TBX5	0.289902	0.254486	0.187602
TEAD3	0.249186	0.249592	0.184339
TEAD4	0.177524	0.269168	0.314845
BHLHE22	0.0879479	0.0831974	0.0619902
BHLHE22(var.2)	0.340391	0.243067	0.164763
CLOCK	0.285016	0.274062	0.141925
FIGLA	0.241042	0.223491	0.226754
HES5	0.361564	0.257749	0.127243
HES7	0.359935	0.256117	0.14845
HEY1	0.278502	0.21044	0.262643
MNT	0.281759	0.231648	0.176183
OLIG1	0.0325733	0.0342577	0.0163132
OLIG3	0.0553746	0.0554649	0.0212072
TCF4	0.270358	0.25938	0.194127
TFE3	0.216612	0.238173	0.267537
TCF21(var.2)	0.211726	0.208809	0.239804
ATF4	0.301303	0.22186	0.150082
ATF7	0.201954	0.238173	0.269168
CEBPD	0.149837	0.241436	0.344209
CEBPE	0.203583	0.233279	0.28385
CEBPG	0.211726	0.236542	0.287113
CEBPG(var.2)	0.162866	0.213703	0.380098
NRL	0.276873	0.22186	0.220228
TEF	0.252443	0.2969	0.23491
XBP1	0.30456	0.233279	0.194127
FOXB1	0.17101	0.140294	0.08646
FOXC2	0.239414	0.184339	0.0848287
FOXD2	0.281759	0.225122	0.104405
FOXK1	0.156352	0.202284	0.358891
RXRB	0.214984	0.282219	0.202284
RXRB(var.2)	0.267101	0.249592	0.208809
RXRG	0.250814	0.272431	0.176183
RXRG(var.2)	0.278502	0.244698	0.212072
TP73	0.324104	0.244698	0.140294
MTF1	0.267101	0.23491	0.230016
E2F2	0.234528	0.265905	0.231648
E2F8	0.19544	0.223491	0.295269
SOX4	0.242671	0.239804	0.251223
SOX8	0.216612	0.220228	0.314845
TFEC	0.236156	0.228385	0.270799
CDX1	0.130293	0.151713	0.0831974
DUXA	0.0211726	0.0146819	0.00326264
EMX2	0.0162866	0.0212072	0.00489396
GBX2	0.301303	0.19739	0.163132
HMBOX1	0.13355	0.101142	0.115824
HOXA10	0.143322	0.192496	0.384992
HOXB13	0.188925	0.174551	0.17292
HOXB3	0.270358	0.225122	0.182708
HOXC10	0.263844	0.249592	0.156607
HOXC13	0.114007	0.120718	0.174551
HOXD11	0.0309446	0.0228385	0.0130506
HOXD13	0.167752	0.216966	0.176183
HOXD8	0.234528	0.208809	0.21044
HOXD9	0.0358306	0.0440457	0.00326264
HES1	0.228013	0.215334	0.295269
ASCL1	0.32899	0.251223	0.169657
ASCL1(var.2)	0.30456	0.252855	0.181077
BACH2	0.172638	0.203915	0.368679
BACH2(var.2)	0.166124	0.205546	0.381729
FOXK2	0.276873	0.24633	0.176183
GATA6	0.193811	0.159869	0.185971
GRHL2	0.211726	0.225122	0.318108
KLF9	0.180782	0.185971	0.358891
MXI1	0.302932	0.244698	0.158238
NEUROD1	0.245928	0.238173	0.252855
NR1H4	0.242671	0.233279	0.215334
NR2F2	0.260586	0.249592	0.199021
NR4A1	0.172638	0.200653	0.381729
PBX2	0.100977	0.120718	0.0766721
PBX3	0.175896	0.187602	0.37031
RBPJ	0.193811	0.189233	0.347471
SIX1	0.131922	0.177814	0.429038
SIX2	0.17101	0.194127	0.313214
SOX13	0.26873	0.244698	0.187602
TEAD2	0.245928	0.277325	0.215334
TFDP1	0.117264	0.181077	0.4323
TWIST1	0.179153	0.216966	0.32137
ZNF24	0.21987	0.24633	0.223491
ZNF384	0.278502	0.216966	0.292007
RORB	0.254072	0.218597	0.28385
RORC	0.184039	0.163132	0.23491
SOX15	0.110749	0.0880914	0.040783
ZNF282	0.180782	0.207178	0.355628
ZSCAN4	0.226384	0.215334	0.301794
IRF3	0.221498	0.238173	0.249592
IRF4	0.164495	0.189233	0.313214
IRF5	0.17101	0.164763	0.412724
ATF6	0.258958	0.207178	0.239804
ATOH7	0.136808	0.119086	0.106036
DMRTA2	0.166124	0.177814	0.218597
ELF2	0.205212	0.275693	0.274062
ETS2	0.161238	0.228385	0.365416
GLI3	0.159609	0.181077	0.389886
HES6	0.278502	0.23491	0.22186
HOXA6	0.26873	0.249592	0.270799
HOXA7	0.234528	0.208809	0.21044
HOXB7	0.226384	0.164763	0.122349
HOXB8	0.234528	0.208809	0.21044
HOXB9	0.19544	0.230016	0.220228
HOXD10	0.0309446	0.0228385	0.0130506
IKZF1	0.26873	0.21044	0.25938
IRF6	0.136808	0.171289	0.425775
KLF2	0.153094	0.185971	0.371941
KLF3	0.12215	0.17292	0.450245
KLF6	0.143322	0.174551	0.414356
MAZ	0.120521	0.17292	0.425775
MSANTD3	0.208469	0.200653	0.318108
NFATC4	0.214984	0.238173	0.251223
NHLH2	0.2557	0.233279	0.239804
NR1D1	0.185668	0.216966	0.301794
NR1D2	0.249186	0.228385	0.212072
NR1I2	0.267101	0.249592	0.205546
NR2C1	0.214984	0.22186	0.323002
NR5A1	0.254072	0.241436	0.223491
NR6A1	0.285016	0.274062	0.187602
OSR1	0.17101	0.247961	0.313214
OVOL1	0.245928	0.218597	0.161501
OVOL2	0.291531	0.25938	0.17292
PITX2	0.23127	0.218597	0.21044
PLAGL2	0.179153	0.220228	0.350734
RFX7	0.174267	0.249592	0.316476
SMAD5	0.288274	0.295269	0.181077
SNAI1	0.311075	0.24633	0.156607
SNAI3	0.312704	0.231648	0.179445
SOHLH2	0.28013	0.212072	0.257749
SOX12	0.180782	0.212072	0.384992
SOX18	0.281759	0.233279	0.203915
SP9	0.118893	0.154976	0.429038
TBX3	0.26873	0.244698	0.213703
TBX6	0.263844	0.25938	0.208809
TFAP2E	0.216612	0.213703	0.324633
THRB	0.265472	0.236542	0.23491
THRB(var.2)	0.162866	0.208809	0.376835
THRB(var.3)	0.161238	0.225122	0.357259
VEZF1	0.197068	0.251223	0.32137
ZBTB26	0.166124	0.213703	0.363785
ZBTB32	0.270358	0.318108	0.28385
ZBTB6	0.247557	0.230016	0.243067
ZFP57	0.216612	0.226754	0.277325
ZIC5	0.18241	0.247961	0.336052
ZKSCAN1	0.224756	0.225122	0.187602
ZNF135	0.192182	0.203915	0.337684
ZNF136	0.276873	0.272431	0.363785
ZNF140	0.2557	0.212072	0.256117
ZNF274	0.211726	0.243067	0.265905
ZNF317	0.20684	0.218597	0.342577
ZNF382	0.236156	0.230016	0.215334
ZNF460	0.14658	0.192496	0.396411
ZNF528	0.19544	0.230016	0.293638
ZNF682	0.17101	0.182708	0.401305
ZNF684	0.188925	0.213703	0.334421
ZNF75D	0.216612	0.213703	0.303426
ZSCAN29	0.252443	0.226754	0.23491
ATF2	0.180782	0.200653	0.331158
EBF3	0.193811	0.218597	0.344209
HAND2	0.148208	0.174551	0.389886
NFIB	0.162866	0.215334	0.360522
NFYC	0.299674	0.236542	0.200653
NKX2-2	0.164495	0.195759	0.358891
OSR2	0.210098	0.213703	0.285481
PRDM4	0.179153	0.243067	0.301794
ZBTB12	0.214984	0.249592	0.274062
ZBTB14	0.161238	0.200653	0.378467
ZFP42	0.169381	0.207178	0.386623
ZKSCAN5	0.13355	0.190865	0.399674
ZNF148	0.107492	0.169657	0.437194
ZNF16	0.214984	0.205546	0.309951
ZNF341	0.190554	0.195759	0.334421
ZNF449	0.188925	0.212072	0.34584
ZNF652	0.0960912	0.106036	0.0587276
FOXA3	0.234528	0.243067	0.230016
